# Supplementary material
Source: ML conference proceedings conference paper supplement (https://aclanthology.org/D18-1383)
Supplement: Attachment [file D18-1383.Attachment.pdf]

| S       | T | Naive | mSDA  | NaiveNN      | AuxNN | ADAN         | MMD   | FANN  | DAS-EM        | DAS-SE        | DAS           |
|---------|---|-------|-------|--------------|-------|--------------|-------|-------|---------------|---------------|---------------|
| D       | B | 75.20 | 78.50 | 81.10        | 80.80 | 81.70        | 81.05 | 80.30 | 82.00*        | <b>82.10*</b> | 82.05*        |
| E       | B | 68.85 | 76.15 | 77.95        | 78.00 | 78.55        | 78.65 | 77.25 | <b>80.25*</b> | 77.75         | 80.00*        |
| K       | B | 70.00 | 75.65 | 77.75        | 77.85 | 79.25        | 79.70 | 79.20 | 79.95         | 79.60         | <b>80.05*</b> |
| B       | D | 77.15 | 80.60 | 80.80        | 81.75 | 82.30        | 82.00 | 81.65 | 82.65         | 82.35         | <b>82.75*</b> |
| E       | D | 69.50 | 76.30 | 77.00        | 80.65 | 79.70        | 80.10 | 79.55 | <b>81.40*</b> | 79.75         | 80.15         |
| K       | D | 71.40 | 76.05 | 79.35        | 78.90 | 80.45        | 79.35 | 76.90 | 81.65*        | <b>82.15*</b> | 81.40*        |
| B       | E | 72.15 | 75.55 | 76.20        | 76.40 | 77.60        | 76.45 | 76.75 | 80.25*        | 75.80         | <b>81.15*</b> |
| D       | E | 71.65 | 76.00 | 76.60        | 77.55 | 79.70        | 80.20 | 79.25 | 81.40*        | 80.05         | <b>81.55*</b> |
| K       | E | 79.75 | 84.20 | 84.85        | 84.05 | <b>86.85</b> | 85.75 | 85.60 | 85.70         | 85.95         | 85.80         |
| B       | K | 73.50 | 75.95 | 77.40        | 78.10 | 76.10        | 75.20 | 77.55 | 81.55*        | 79.45*        | <b>82.25*</b> |
| D       | K | 72.00 | 76.30 | 78.55        | 80.05 | 77.35        | 79.70 | 78.00 | 80.80         | 79.50         | <b>81.50*</b> |
| E       | K | 82.80 | 84.45 | <b>84.95</b> | 84.15 | 83.95        | 81.75 | 83.85 | 84.50         | 83.80         | 84.85         |
| Average |   | 73.66 | 77.98 | 79.38        | 79.85 | 80.29        | 80.00 | 79.65 | 81.84         | 80.68         | <b>81.96</b>  |

Table 3: Accuracies on the Amazon benchmark. Average results over 5 runs with random initializations are reported for each neural method. \* indicates that the proposed method (DAS-EM, DAS-SE, DAS) is significantly better than other baselines with  $p < 0.05$  based on one-tailed unpaired t-test.

## A Results on Amazon Benchmark

Most previous works (Blitzer et al., 2007; Pan et al., 2010; Glorot et al., 2011; Chen et al., 2012; Zhou et al., 2016) carried out experiments on the Amazon benchmark released by Blitzer et al. (2007). The dataset contains 4 different domains: Book (B), DVDs (D), Electronics (E), and Kitchen (K). Following their experimental settings, we consider the binary classification task to predict whether a review is positive or negative on the target domain. Each domain consists of 1000 positive and 1000 negative reviews respectively. We also allow 4000 unlabeled reviews to be used for both the source and the target domains, of which the positive and negative reviews are balanced as well, following the settings in previous works. We construct 12 cross-domain sentiment classification tasks and split the labeled data in each domain into a training set of 1600 reviews and a test set of 400 reviews. The classifier is trained on the training set of the source domain and is evaluated on the test set of the target domain. The comparison results are shown in Table 3.

## B Numerical Results of Figure 1

Due to space limitation, we only show results in figures in the paper. All numerical numbers used for plotting Figure 1 are presented in Table 4. We can observe that DAS-EM, DAS-SE, and DAS all achieve substantial improvements over baseline methods under different settings.

## C CNN Filter Analysis Full Results

As mentioned in Section 4.8, we conduct CNN filter analysis on NaiveNN, FANN, and DAS. For each method, we identify the top 10 most related filters for positive, negative, neutral sentiment labels respectively, and then represent each selected filter as a ranked list of trigrams with the highest activation values on it. Table 5, 6, 7 in the following pages illustrate the trigrams from the target domain (beauty) captured by the selected filters learned on  $E \rightarrow BT$  for each method.

We can observe that compared to NaiveNN and FANN, DAS is able to capture a more diverse set of relevant sentiment expressions on the target domain for each sentiment label. This observation is consistent with our motivation. Since NaiveNN, FANN and other baseline methods solely train the sentiment classifier on the source domain, the learned encoder is not able to produce discriminative features on the target domain. DAS addresses this problem by refining the classifier on the target domain with semi-supervised learning, and the overall objective forces the encoder to learn feature representations that are not only domain-invariant but also discriminative on both domains.

| S       | T  | Naive | mSDA  | NaiveNN | AuxNN | ADAN  | MMD   | FANN  | DAS-EM        | DAS-SE        | DAS           |
|---------|----|-------|-------|---------|-------|-------|-------|-------|---------------|---------------|---------------|
| E       | BK | 49.07 | 55.13 | 58.26   | 60.62 | 63.32 | 60.38 | 59.59 | 66.48*        | 62.37         | <b>67.12*</b> |
| BT      | BK | 48.17 | 53.53 | 58.48   | 59.86 | 65.62 | 59.66 | 59.28 | <b>66.78*</b> | 61.17         | 66.53         |
| M       | BK | 45.20 | 49.22 | 57.10   | 60.43 | 62.87 | 60.20 | 57.65 | 69.63*        | 65.24*        | <b>70.31*</b> |
| BK      | E  | 46.43 | 48.22 | 47.15   | 48.45 | 47.42 | 53.32 | 51.27 | 58.59*        | 55.15*        | <b>58.73*</b> |
| BT      | E  | 53.63 | 57.32 | 58.77   | 60.98 | 63.13 | 60.53 | 60.62 | 65.71*        | 61.78         | <b>66.14*</b> |
| M       | E  | 37.93 | 38.13 | 47.28   | 49.60 | 46.57 | 51.55 | 47.23 | <b>55.88*</b> | 53.22*        | 55.78*        |
| BK      | BT | 45.57 | 50.77 | 48.35   | 48.67 | 46.14 | 49.48 | 50.24 | 49.49         | <b>54.23*</b> | 51.30*        |
| E       | BT | 48.43 | 53.13 | 54.07   | 55.58 | 50.98 | 54.83 | 56.78 | <b>61.53*</b> | 59.52*        | 60.76*        |
| M       | BT | 39.42 | 39.37 | 47.23   | 48.65 | 44.26 | 48.35 | 48.89 | 47.65         | <b>50.67*</b> | 50.66*        |
| BK      | M  | 43.32 | 47.88 | 47.67   | 48.87 | 51.10 | 53.04 | 52.35 | 55.47*        | 55.13*        | <b>55.98*</b> |
| E       | M  | 41.83 | 47.88 | 50.21   | 51.19 | 50.23 | 51.81 | 52.14 | 58.28*        | 55.60*        | <b>59.06*</b> |
| BT      | M  | 43.55 | 49.62 | 50.27   | 53.11 | 55.35 | 54.43 | 53.84 | <b>60.95*</b> | 56.90*        | 60.5*         |
| Average |    | 45.21 | 49.18 | 52.07   | 53.84 | 53.92 | 54.80 | 54.15 | 59.74         | 57.58         | <b>60.24</b>  |

(a) Accuracy on the small-scale dataset under setting 1

| S       | T  | Naive | mSDA  | NaiveNN | AuxNN | ADAN  | MMD   | FANN  | DAS-EM        | DAS-SE        | DAS           |
|---------|----|-------|-------|---------|-------|-------|-------|-------|---------------|---------------|---------------|
| E       | BK | 49.07 | 52.88 | 58.26   | 57.72 | 57.07 | 57.43 | 56.43 | 57.78         | <b>58.93</b>  | 55.20         |
| BT      | BK | 48.17 | 47.65 | 58.48   | 58.46 | 59.78 | 56.17 | 57.98 | 61.17*        | 60.17*        | <b>63.32*</b> |
| M       | BK | 45.20 | 48.33 | 57.10   | 58.15 | 58.67 | 57.08 | 57.75 | 58.62         | 58.25         | <b>60.77*</b> |
| BK      | E  | 46.43 | 47.07 | 47.15   | 48.22 | 49.48 | 45.42 | 51.95 | <b>54.51*</b> | 52.47*        | 53.92*        |
| BT      | E  | 53.63 | 55.12 | 58.77   | 59.08 | 59.45 | 60.24 | 58.67 | 61.27         | <b>61.42</b>  | 59.83         |
| M       | E  | 37.93 | 37.40 | 47.28   | 49.43 | 47.00 | 48.72 | 48.92 | 51.28*        | 51.18*        | <b>52.88*</b> |
| BK      | BT | 45.57 | 49.63 | 48.35   | 47.80 | 47.52 | 45.43 | 49.83 | 53.72*        | 51.23*        | <b>54.67*</b> |
| E       | BT | 48.43 | 51.98 | 54.07   | 54.37 | 51.28 | 54.92 | 55.42 | 53.10         | <b>56.43*</b> | 56.05*        |
| M       | BT | 39.43 | 37.73 | 47.23   | 46.92 | 45.73 | 46.68 | 48.48 | 47.18         | <b>51.57*</b> | 49.73*        |
| BK      | M  | 43.32 | 45.97 | 47.67   | 48.79 | 50.20 | 48.76 | 49.47 | 52.37*        | 52.68*        | <b>53.52*</b> |
| E       | M  | 41.83 | 45.12 | 50.21   | 52.31 | 52.57 | 51.50 | 48.18 | 53.63*        | 52.25         | <b>55.38*</b> |
| BT      | M  | 43.55 | 45.78 | 50.27   | 53.55 | 54.68 | 54.55 | 53.41 | <b>56.24*</b> | 56.23*        | 56.02*        |
| Average |    | 45.21 | 47.06 | 52.07   | 52.98 | 52.79 | 52.23 | 53.04 | 55.07         | 55.23         | <b>55.94</b>  |

(b) Accuracy on the small-scale dataset under setting 2

| S       | T | NaiveNN      | ADAN  | MMD          | FANN  | DAS-EM        | DAS-SE        | DAS           |
|---------|---|--------------|-------|--------------|-------|---------------|---------------|---------------|
| Y       | I | 53.01        | 55.52 | 54.16        | 54.46 | 55.04         | 56.66*        | <b>58.54*</b> |
| C       | I | 51.84        | 55.07 | 53.35        | 53.07 | 57.27*        | 55.18         | <b>57.28*</b> |
| B       | I | 45.85        | 54.64 | 51.40        | 52.39 | 57.31*        | 54.30         | <b>58.02*</b> |
| I       | Y | 55.46        | 52.57 | 56.52        | 56.30 | 57.92*        | 58.72*        | <b>58.92*</b> |
| C       | Y | 61.22        | 60.70 | 60.81        | 56.02 | 61.17         | 59.14         | <b>61.39</b>  |
| B       | Y | 56.86        | 58.42 | 58.77        | 55.72 | 59.94*        | 58.43         | <b>61.87*</b> |
| I       | C | 50.38        | 47.27 | 50.49        | 51.04 | <b>53.46*</b> | 51.97*        | 53.38*        |
| Y       | C | 53.87        | 52.53 | 53.12        | 51.86 | 53.48         | <b>54.67*</b> | <b>55.44*</b> |
| B       | C | 59.48        | 59.91 | <b>61.23</b> | 60.19 | 59.84         | 59.98         | 59.76         |
| I       | B | 50.05        | 46.34 | 47.35        | 48.17 | 48.84         | <b>50.81</b>  | 48.84         |
| Y       | B | <b>54.73</b> | 50.82 | 54.43        | 53.54 | 52.87         | 52.95         | 52.91         |
| C       | B | 60.47        | 59.99 | <b>60.52</b> | 55.56 | 57.74         | 58.12         | 59.75         |
| Average |   | 54.43        | 54.48 | 55.18        | 54.02 | 56.24         | 55.91         | <b>57.18</b>  |

(c) Macro-F1 scores on the large-scale dataset

Table 4: Performance comparison. Average results over 5 runs with random initializations are reported for each neural method. \* indicates that the proposed method (DAS, DAS-EM, DAS-SE) is significantly better than other baselines with  $p < 0.05$  based on one-tailed unpaired t-test.

|                     |                            |                       |                        |                   |
|---------------------|----------------------------|-----------------------|------------------------|-------------------|
| 1                   | 2                          | 3                     | 4                      | 5                 |
| best-value-at       | highly-recommend-!         | nars-are-amazing      | beauty-store-suggested | since-i-love      |
| good-value-at       | highly-advise-!            | ulta-are-fantastic    | durable-machine-and    | years-i-love      |
| perfect-product-for | gogeous-absolutely-perfect | length-are-so         | perfect-length-and     | bonus-i-love      |
| great-product-at    | love-love-love             | expected-in-perfect   | great-store-on         | appearance-i-love |
| amazing-product-*   | highly-recommend-for       | setting-works-perfect | beauty-store-for       | relaxing-i-love   |
| 6                   | 7                          | 8                     | 9                      | 10                |
| store-and-am        | office-setting-thanks      | car-washes-!          | speed-is-perfect       | !-i-recommend     |
| cleanser-and-am     | locks-shimmering-color     | price-in-stores       | buttons-are-perfect    | !-i-highly        |
| olay-and-am         | dirty-blonde-color         | products-are-priced   | unit-is-superb         | shower-i-slather  |
| daily-and-need      | victoria-secrets-gorgeous  | car-and-burning       | spray-is-perfect       | spots-i-needed    |
| shower-and-noticed  | dirty-pinkish-color        | from-our-store        | coverage-is-excellent  | best-i-use        |

(a) NaiveNN

|                         |                           |                       |                        |                        |
|-------------------------|---------------------------|-----------------------|------------------------|------------------------|
| 1                       | 2                         | 3                     | 4                      | 5                      |
| prices-my-favorite      | so-nicely-!               | purchase-thanks-!     | feel-wonderfully-clean | are-really-cleaning    |
| brands-my-favorite      | more-affordable-price     | buy-again-!           | on-nicely-builds       | washing-and-cleaning   |
| very-great-stores       | shampoo-a-perfect         | without-hesitation-!  | polish-easy-and        | really-good-shampoo    |
| great-bottle-also       | an-excellent-value        | buy-this-!            | felt-cleanser-than     | deeply-cleans-my       |
| scent-pleasantly-floral | really-enjoy-it           | discount-too-!        | honestly-perfect-it    | totally-moisturize-our |
| 6                       | 7                         | 8                     | 9                      | 10                     |
| shower-or-cleaning      | definitely-purchase-again | more-affordable-price | absolutely-wonderful-! | felt-cleaner-than      |
| water-onto-my           | definitely-buy-again      | a-perfect-length      | perfect-for-running    | flat-iron-through      |
| bleach-your-towels      | perfect-for-my            | an-exceptional-value  | concealer-for-my       | rubbed-grease-on       |
| pump-onto-my            | definitely-order-again    | `ve-enjoyed-it        | moisturizing-for-my    | deeply-cleans-my       |
| water-great-for         | super-happy-to            | pretty-decent-layer   | super-glue-even        | being-cleaner-after    |

(b) FANN

|                           |                           |                              |                           |                             |
|---------------------------|---------------------------|------------------------------|---------------------------|-----------------------------|
| 1                         | 2                         | 3                            | 4                         | 5                           |
| bath-'s-wonderful         | love-fruity-sweet         | feeling-smooth-radiant       | cleans-thoroughly-*       | excellent-everyday-lotion   |
| all-pretty-affordable     | absorb-really-nicely      | love-lavender-scented        | loving-this-soap          | affordable-cleans-nicely    |
| it-delivers-fabulous      | shower-lather-wonderfully | am-very-grateful             | bed-of-love               | fantastic-base-coat         |
| and-blends-nicely         | *-smells-fantastic        | love-fruity-fragrances       | shower-!-*                | nice-gentle-scrub           |
| heats-quickly-love        | and-clean-excellent       | perfect-beautiful-shimmer    | radiant-daily-moisturizer | surprisingly-safe-on        |
| 6                         | 7                         | 8                            | 9                         | 10                          |
| shower-lather-wonderfully | highly-recommend-!        | excellent-fragrance-and      | its-unique-smoothing      | forgeous-gragrance-mist     |
| affordable-cleans-nicely  | definitely-recommend-!    | fantastic-for-daytime        | smooth-luxurious-texture  | wonderful-bedtime-scent     |
| peels-great-price         | love-love-!               | wonderfully-moisturizing-and | 's-extremely-gentle       | love-essie-polish           |
| daughter-loves-this       | highly-advise-!           | lathers-great-cleans         | 's-affordable-combination | perfect-beautiful-shimmer   |
| cleans-great-smells       | time-advise-!             | delightful-shampoo-works     | absorbs-quite-well        | fantastic-coverage-hydrates |

(c) DAS

Table 5: Top 5 trigrams from the target domain (beauty) captured by the top 10 most **positive-sentiment-related** CNN filters learned on  $E \rightarrow BT$ . \* denotes a padding.

|                                                                                                                        |                                                                                                                 |                                                                                                                            |                                                                                                                |                                                                                                                  |
|------------------------------------------------------------------------------------------------------------------------|-----------------------------------------------------------------------------------------------------------------|----------------------------------------------------------------------------------------------------------------------------|----------------------------------------------------------------------------------------------------------------|------------------------------------------------------------------------------------------------------------------|
| 1<br>pads-ruined-my<br>highly-disappointed-and<br>dryers-blew-my<br>completely-worthless-didn't<br>am-disappointed-and | 2<br>simply-threw-out<br>reviewer-pointed-out<br>extracts-broke-into<br>actually-threw-out<br>clips-barely-keep | 3<br>hours-after-trying<br>minutes-after-rinsing<br>disappointed-after-trying<br>lips-after-trying<br>dry-after-shampooing | 4<br>junk-drawer-<br>refund-time-!<br>total-fake-wen<br>waste-your-time<br>total-fail-!                        | 5<br>contacted-manufacturer-about<br>minutes-not-this<br>'ve-owned-this<br>hour-unless-it<br>results-they-claim  |
| 6<br>were-awful-garbage<br>what-awful-garbage<br>and-utter-waste<br>are-absolute-garbage<br>piece-of-junk              | 7<br>two-failed-attempts<br>a-mistake-save<br>a-definite-return<br>a-pathetic-limp<br>a-total-disappointment    | 8<br>auto-ship-sent<br>am-returning-to<br>am-unable-to<br>am-pale-ghost<br>got-returned-and                                | 9<br>refund-and-dispose<br>refund-spend-your<br>wouldn't-recommend-!<br>not-buy-dunhill<br>not-worth-returning | 10<br>broke-don't-fix<br>sent-me-expired<br>wearing-false-eyelashes<br>a-temporary-fix<br>a-disappointment-cheap |

(a) NaiveNN

|                                                                                                                    |                                                                                                                    |                                                                                                                |                                                                                                                            |                                                                                                                             |
|--------------------------------------------------------------------------------------------------------------------|--------------------------------------------------------------------------------------------------------------------|----------------------------------------------------------------------------------------------------------------|----------------------------------------------------------------------------------------------------------------------------|-----------------------------------------------------------------------------------------------------------------------------|
| 1<br>nasty-sunburn-lol<br>bother-returning-them<br>fails-miserably-at<br>minutes-audic-needs<br>severely-burned-me | 2<br>the-worse-mascaras<br>it-caused-patchy<br>lifeless-disaster-enter<br>it-fails-miserably<br>feel-worse-leaving | 3<br>stale-very-unhappy<br>were-horrible-failures<br>send-this-crap<br>were-awful-garbage<br>were-horribly-red | 4<br>actually-hurts-your<br>didn't-bother-returning<br>it-hurts-your<br>didn't-exist-in<br>skin-horribly-after             | 5<br>a-return-label<br>stay-away-completely<br>like-bug-quit<br>a-defective-brown<br>'d-refund-the                          |
| 6<br>worse-with-exercise<br>worse-and-after<br>unable-to-return<br>worse-my-face<br>poorly-in-step                 | 7<br>not-stink-your<br>mistake-save-your<br>nothing-!-by<br>nothing-happened-!<br>nothing-save-your                | 8<br>it-fails-miserably<br>is-ineffective-apart<br>but-horribly-unhealthy<br>a-pathetic-limp<br>a-worse-job    | 9<br>got-progressively-worse<br>gave-opposite-result<br>another-epic-fail<br>got-horribly-painful<br>was-downright-painful | 10<br>stopped-working-for<br>uncomfortable-i-returned<br>i-am-returning<br>stopped-working-shortly<br>not-waterproof-makeup |

(b) FANN

|                                                                                                                               |                                                                                                             |                                                                                                                           |                                                                                                                       |                                                                                                                           |
|-------------------------------------------------------------------------------------------------------------------------------|-------------------------------------------------------------------------------------------------------------|---------------------------------------------------------------------------------------------------------------------------|-----------------------------------------------------------------------------------------------------------------------|---------------------------------------------------------------------------------------------------------------------------|
| 1<br>poorly-designed-product<br>defective-dryer-promising<br>disgusting-smelling-thing<br>hurts-your-scalp<br>hurts-your-hair | 2<br>a-refund-spend<br>a-refund-save<br>i-regret-spending<br>just-wouldn't-spend<br>looked-washed-out       | 3<br>completely-waste-of<br>of-junk-<br>were-awful-garbage<br>worthless-waste-of<br>throwing-money-away                   | 4<br>smells-disgusting-!<br>smells-horribly-like<br>does-not-straighten<br>'s-false-advertising<br>a-disgusting-cheap | 5<br>burning-rubber-stench<br>began-smelling-vomit<br>reaction-and-wasted<br>control-and-smelled<br>using-this-disgusting |
| 6<br>super-irritating-!<br>strong-reaction-and<br>really-burned-and<br>very-pasty-and<br>super-streaky-and                    | 7<br>got-promptly-broke<br>after-ive-washed<br>after-several-attempts<br>this-stuff-stinks<br>again-i-threw | 8<br>sore-and-painful<br>is-simply-irritating<br>tight-and-uncomfortable<br>drying-and-irritating<br>goopy-and-unpleasant | 9<br>it-caused-patchy<br>layer-hydrogenated-alcohols<br>the-harmful-uva<br>my-severe-dark<br>a-allergic-reaction      | 10<br>painful-it-hurt<br>unnecessary-health-risks<br>uncomfortable-to-wear<br>stinging-your-eyes<br>unbearable-to-wear    |

(c) DAS

Table 6: Top 5 trigrams from the target domain (beauty) captured by the top 10 most **negative-sentiment-related** CNN filters learned on  $E \rightarrow BT$ . \* denotes a padding.

|                        |                            |                           |                         |                       |
|------------------------|----------------------------|---------------------------|-------------------------|-----------------------|
| 1                      | 2                          | 3                         | 4                       | 5                     |
| purpose-cologne-splash | okay-cord-was              | hands-feet-elbows         | aggressive-in-general   | but-its-okay          |
| other-hanae-mori       | cocamide-dea-is            | been-sealed-tight         | pimples-in-general      | it-moisturizes-okay   |
| the-mavala-peeled      | coily-conditioner-is       | stainless-steel-blackhead | biotin-in-general       | but-moisturizes-keeps |
| avoid-hair-pulling     | flaky-dandruff-is          | severely-tight-chest      | dimethicone-is-terrible | but-don't-expect      |
| cause-rashes-stinging  | quickly-cord-is            | thick-nasty-callouses     | but-in-general          | it-lathers-ok         |
| 6                      | 7                          | 8                         | 9                       | 10                    |
| pretty-damaged-from    | darker-olive-complexion    | doesn't-mind-pushing      | producto-por-los        | feeling-didn't-last   |
| daughter-suffers-from  | stronger-healthier-or      | kinda-doesn't-its         | unstuck-frownies-*      | curls-didn't-last     |
| teenager-suffers-from  | natural-ingredient-however | kinda-kinky-coily         | they-push-*             | extra-uv-protection   |
| tissue-damage-during   | vitamin-enriched-color     | okay-job-of               | uva-rays-uva            | garnier-fructis-curl  |
| the-damage-on          | natural-ingredients-*      | intended-purpose-that     | tend-to-slip            | the-mavala-after      |

(a) NaiveNN

|                          |                       |                             |                       |                        |
|--------------------------|-----------------------|-----------------------------|-----------------------|------------------------|
| 1                        | 2                     | 3                           | 4                     | 5                      |
| worse-and-after          | maybe-a-refund        | very-disappointing-waste    | my-ears-are           | pretty-neutral-neither |
| worse-before-improving   | ok-mask-i             | ok-but-clean                | my-neck-line          | ok-so-if               |
| unable-to-return         | ok-pining-it          | ok-but-will                 | cause-unsightly-beads | ok-during-pregnancy    |
| unless-your-entire       | ok-try-i              | ok-but-didn't               | my-sporadic-line      | kinda-annoying-if      |
| horrible-in-execution    | ok-tho-i              | ok-nothing-special          | your-ear-is           | ok-this-seems          |
| 6                        | 7                     | 8                           | 9                     | 10                     |
| uncomfortable-i-returned | sticky-lathers-and    | some-fading-when            | are-very-painful      | its-also-convenient    |
| weak-they-bend           | quickly-deep-cleans   | real-disappointment-the     | are-less-painful      | that-also-my           |
| claimed-faulty-*         | but-elegant-bottle    | especially-noticeable-after | are-a-pain            | that-may-make          |
| suffers-from-wind        | beat-the-price        | progressively-worse-during  | about-sum-damage      | that-allows-your       |
| as-defective-*           | and-reasonably-priced | style-unfortunately-the     | offered-no-pain       | its-helpful-to         |

(b) FANN

|                         |                       |                        |                          |                         |
|-------------------------|-----------------------|------------------------|--------------------------|-------------------------|
| 1                       | 2                     | 3                      | 4                        | 5                       |
| 'm-kinda-pale           | darker-but-nope       | ok-but-horrible        | noticeable-i-avoid       | same-result-mediocre    |
| a-terrible-headache     | gray-didn't-cover     | ok-but-didn't          | however-i-lean           | it-caused-patchy        |
| but-kinda-annoying      | makeup-doesn't-sweat  | okay-but-doesn't       | but-otherwise-ok         | doesn't-cause-flare     |
| 'm-kinda-mad            | dark-spots-around     | okay-however-it        | but-im-deciding          | the-harmful-uva         |
| i-kinda-stopped         | moist-but-thats       | unfortunately-straight | however-i-prefer         | rather-unpleasant-smell |
| 6                       | 7                     | 8                      | 9                        | 10                      |
| kinda-annoying-if       | brutal-winter-however | higher-rating-because  | nothing-for-odor         | but-darker-*            |
| pretty-bad-breakage     | summer-color-however  | slight-burnt-rubber    | kinda-recommend-this     | slightly-darker-shade   |
| my-slight-discoloration | beige-shade-however   | noticeable-tan-since   | not-recommend-if         | somewhat-pale-affect    |
| smells-kinda-bad        | is-okay-however       | somewhat-pale-affect   | noticeable-but-non       | but-somewhat-heavy      |
| look-kinda-crappy       | bit-greasy-however    | kinda-pale-so          | nothing-special-moderate | bit-dull-heavy          |

(c) DAS

Table 7: Top 5 trigrams from the target domain (beauty) captured by the top 10 most **neutral-sentiment-related** CNN filters learned on  $E \rightarrow BT$ . \* denotes a padding.
